# Challenges in calibration of water distribution network: a case study of Ramnagar Elevated Service Reservoir command area in Nagpur City, India

Shweta Rathi, Rajesh Gupta, Pawan Labhassetwar and Pranav Nagarnaik

## ABSTRACT

Calibration of a hydraulic model is a challenging task as it considers the involvement of a large number of uncertain parameters. There are some parameters like length and diameter of pipes, for which fairly accurate values can be obtained. As with all hydraulic models, water demands are one of the main parameters that cause the most uncertainty in the model outputs. The calibration of the water demands is usually not feasible, which is attributable to the limited quantity of available measurements in most real water networks. However, some parameters like nodal demands and pipe roughness coefficients are estimated close to the actual values. Various types of valves are used for flow control by throttling. Hence, their setting in the field is also an important input to the model. Having more precise data helps in reducing time and results in better calibration as presented in the case study of one hydraulic zone served from Ramnagar Elevated Service Reservoir (ESR) (Zone II) in Nagpur City, Maharashtra State, India. This paper aims at presenting the complexities and challenges involved in calibration of the study area. It further describes the entire process from collection of the required data to the calibration of the network.

**Key words** | calibration, hydraulic model, network simulation, water distribution network

**Shweta Rathi** (corresponding author)

**Rajesh Gupta**

Civil Engineering Department,  
Visvesvaraya National Institute of Technology,  
Nagpur, Maharashtra, 440 010,  
India

E-mail: shwetanabira12345@rediffmail.com

**Pawan Labhassetwar**

**Pranav Nagarnaik**

National Environmental Engineering Research  
Institute,  
Nagpur, Maharashtra, 440 020,  
India

## LIST OF ACRONYMS

|       |                                                       |       |                                               |
|-------|-------------------------------------------------------|-------|-----------------------------------------------|
| BV    | Butterfly valve                                       | NMC   | Nagpur Municipal Corporation                  |
| CEO   | Chief executive officer                               | NRW   | Non-revenue water                             |
| CP    | Critical point                                        | OCW   | Orange City Water Works                       |
| ESR   | Elevated Service Reservoir                            | PMP   | Pressure monitoring point                     |
| FCV   | Flow control valve                                    | PRV   | Pressure reducing valve                       |
| FM    | Flow meter                                            | SCADA | Supervisory Control and Data Acquisition      |
| GA    | Genetic algorithm                                     | SV    | Sluice valve                                  |
| GIS   | Geographical information system                       | VNIT  | Visvesvaraya National Institute of Technology |
| HDPE  | High-density polyethylene                             | WDS   | Water distribution system                     |
| HGL   | Hydraulic grade line                                  |       |                                               |
| HSC   | House service connection                              |       |                                               |
| HW    | Hazen–Williams                                        |       |                                               |
| LSL   | Lowest supply level                                   |       |                                               |
| NEERI | National Environmental Engineering Research Institute |       |                                               |
| NLP   | Nonlinear programming                                 |       |                                               |

doi: 10.2166/ws.2020.047

## INTRODUCTION

Hydraulic models are widely used as vital tools to facilitate the design, operation, and management of water distribution systems (WDSs) (Méndez *et al.* 2013). Several methodologies

have been developed in the past to improve WDS modeling technologies. Without appropriate estimation of parameters, a numerical model would not correctly simulate reality. As a result, the planning or operational decisions based on such simulation analysis may lead to serious errors. Calibration of a water distribution systems model is defined as the process of adjusting network parameters so that the output from the computer model matches the field measurements, which are usually the pressures and flow rates at particular locations in the network (Shamir & Howard 1977). The calibration procedure for a water network model has been well addressed by Ormsbee & Lingireddy (1997). A number of previous studies have demonstrated that many systems and operation factors can affect the calibration accuracy of WDS models, such as nodal demands (Huang *et al.* 2017a), pipe friction/roughness (Duan *et al.* 2010), and pipe defects and devices (Duan 2015; Huang *et al.* 2017b).

Calibration of a water distribution system is a challenging task as there are a large number of input parameters such as nodal elevations and demands, including water losses, pipe length, diameter and roughness coefficients, water level at the source and pump characteristics, valve settings, etc. It is desirable that most of these parameters are measured accurately during field observations so that few uncertain parameters require adjustments during the calibration. Field survey provides reliable data regarding pipe length, ground levels, operating valve settings and status, and water level at the sources. In general, data regarding the nodal consumption and pipe roughness coefficients are less reliable and therefore may need adjustment during the calibration. In actual practice, there is a lot of difference between the model-predicted behavior and actual field results. This network must be calibrated so that it can be reliably used for any practical application (Walski 1986).

Calibration methods are classified into three categories: (1) trial-and-error procedure models, (2) explicit method, and (3) implicit method or optimization methods. In the first type of calibration method, several methods have been suggested to simultaneously adjust pipe roughness coefficient and nodal demands (Walski 1983, 1986; Bhavé 1988; Boulos & Wood 1990; Reddy *et al.* 1996; Todini 1999; Wu *et al.* 2002; Walski *et al.* 2003; Bhavé & Gupta 2006; Kang & Lansey 2011; Dini & Tabesh 2014; Maier *et al.* 2014, etc.). On the other hand, several methods adjust the

pipe roughness coefficient only and it is presumed that nodal demands are fairly accurate and do not need any adjustment (Rahal *et al.* 1980; Kumar *et al.* 2010; Jadhao & Gupta 2018, etc.). Several methods have suggested adjustment of the nodal demand and leakage estimation in WDS models (Di Nardo *et al.* 2015; Kun *et al.* 2015, etc.).

In the second approach, the calibration of the model could be carried out through explicit approaches (e.g. Ormsbee & Wood 1986; Bhavé 1988; Boulos & Wood 1990; Todini 1999). It involves solving an extended set of continuity and head-loss equations where the calibration problem is required to be even-determined, i.e. the number of calibrated parameters must be equal to the number of measurements. When the number of unknown parameters is larger than the number of measurements, calibration parameters are often grouped that may result in potentially impractical outputs.

The third method for the calibration of the model is through implicit approaches (e.g. Ormsbee 1989; Lansey & Basnet 1991; Datta & Sridharan 1994; Greco & Giudice 1999; Lansey *et al.* 2001; Lingireddy & Ormsbee 2002; Bascià & Tucciarelli 2003; Kapelan *et al.* 2007; Koppel & Vassiljev 2009) in which field-observed and measured parameters are treated as known parameters and directly used in the model analysis. The implicit approach requires that the number of flow and pressure measurements exceeds the number of unknowns. The implicit problem formulation can be solved using optimization techniques, e.g. nonlinear programming (NLP) or an evolutionary technique like genetic algorithm (GA).

Jadhao & Gupta (2018) carried out the manual calibration of one of the zones of Nagpur City, where the nodal demands are calculated based on the consumers' billing record. The non-revenue water losses were uniformly allocated to all junctions. Valve positions and their opening status were obtained from the field and pipe roughness coefficient values were adjusted for calibration. A similar study is carried out in this paper. However, the very complex zone of Nagpur City, India, is considered for the study purpose and the complexities, challenges and detailed procedure for calibration are discussed herein.

In this paper, a case study of one of the parts of Nagpur City in Maharashtra State in India is considered for calibration of the network of Ramnagar Elevated Service

Reservoir (ESR) in the pilot zone after its conversion to a continuous water supply system. Nagpur Municipal Corporation (NMC) in Nagpur City, India, has implemented a 24 × 7 water supply project on a pilot basis in one of the water supply zones having 7,254 consumer connections with the objective of water and energy loss control to provide better services to consumers. The main aim of the paper is to describe the challenges and complexities involved in the study area for calibration. Further, it describes the detailed steps of calibration of the study area. The procedure of calibration is described in the following different steps: (1) collecting calibration data, (2) hydraulic model preparation and initial results, (3) data validation, (4) hydraulic model improvement, (5) micro-calibration, and (6) results and conclusions.

## METHODOLOGY USED

Several methods are available in the literature for calibration of water distribution networks (WDNs) (Bhave & Gupta 2006; Kang & Lansey 2011; Sanz & Pérez 2015; Do et al. 2016). One group of methods considers both pipe coefficient and nodal demands as uncertain and adjusts them simultaneously during calibration, while the other group of methods presumes nodal demands are fairly accurate and do not need any adjustment. Only pipe roughness coefficients are adjusted.

A reasonable agreement between the computed and observed values of field pressure should be reached during calibration. Walski (1983) suggested an average difference of  $\pm 1.5$  m with a maximum value of  $\pm 5.0$  m in computed and observed field pressures for a good data set and the corresponding values of  $\pm 3$  and  $\pm 10$  m for a poor data set. Cesario & Davis (1984) recommended an accuracy of 3.5–7.0 m as a reasonable target.

In this study, pipes are divided into groups based on material, diameter and age, and a common value of pipe roughness coefficient is considered for all pipes in a group. Online monitoring of flow at the source and pressures at two salient points are carried out and hourly flow and pressure data are used for calibration. The sum of squares of the difference between the observed and modeled values is minimized for optimum values of pipe coefficients. Percentage error in calibration is calculated.

## STUDY AREA AND NETWORK DETAILS

Nagpur, a second capital of Maharashtra State, is situated in the center of India. The population of the city is 2.53 million (2015) spread over 217 sq. km. The total water supply to the city is over 650 MLD through 54 service reservoirs and a 3,200-km-long distribution network covering 239,000 connections. The study area consists of one hydraulic zone of Ramnagar ESR located at the western part of Nagpur City and composed of a residential area with all types of dwellings including slum areas as well as institutional and commercial areas. During the conversion of mode from intermittent to continuous, all property connections were changed, faulty meters were replaced/repared, illegal connections were removed/regularized, public stand posts were converted to grouped pipe connections with metering, and old pipelines (about one-third of total pipelines) were replaced by new pipelines.

The water distribution network shown in Figure 1 has one source of supply (R-1), 619 nodes and 733 pipes. The network is organized in 33 subzones consisting of 12 wards. Out of the 33 subzones, 26 are fully served by Ramnagar ESR and seven are partly served. The pressure and flow in these 33 subzones are controlled by 69 valves. Each of the subzones is controlled by one or more valves. The network has two inlets, i.e. water enters into the network from two sources such as from the reservoir as well as a bypass line, which is shown in Figure 2.

## CHALLENGES IN STUDY AREA

1. Ramnagar ESR is located at elevated areas as compared with other ESRs on feeder mains named as Gayatri Nagar, Pratap Nagar, Chinchbhuwan and others.
2. Some portions in this study area are at higher elevation and some are at lower elevation. As a result, when the supply is at a lower elevation area, the pressure at the higher elevation areas reduces. Therefore, the main challenge is that it is difficult to manage the pressure in systems overall.

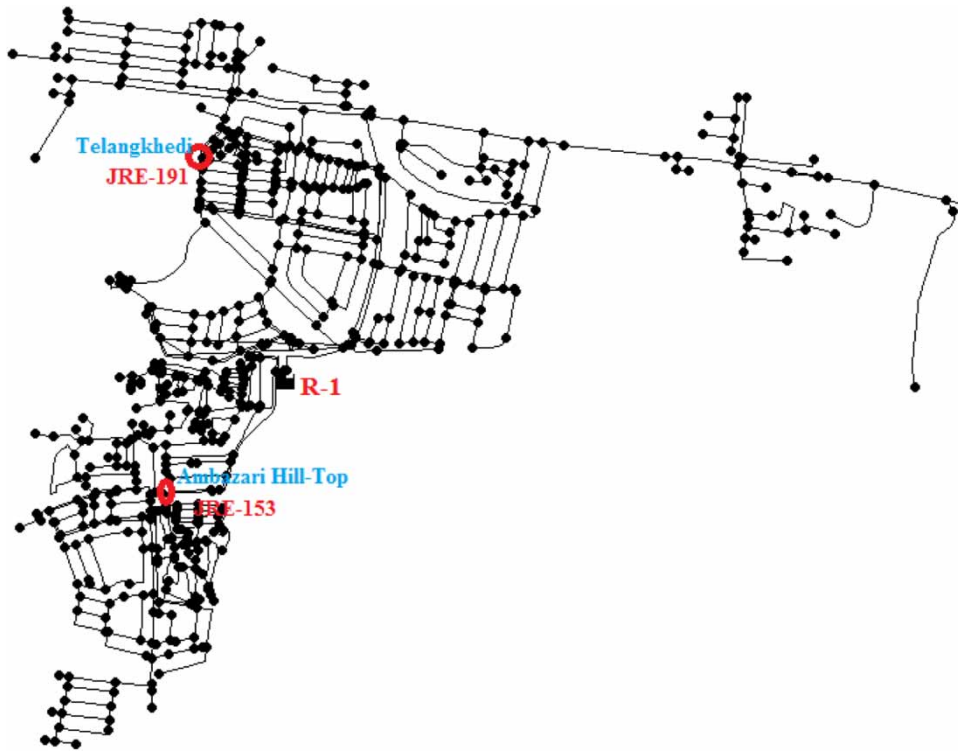

**Figure 1** | Water distribution network of Ramnagar ESR, Nagpur, Maharashtra, India.

3. As shown in Figure 2(a), the supply is from ESR and from a bypass line. ESR supplies the water for very little of the period and most of the time water is supplied from the bypass line. Network inlet and outlet pipe arrangements are shown in Figure 2(b).
4. Valves operated in ESR premises result in significant head loss and low-pressure issues in elevated areas.
5. One of the critical points (CP1) or pressure monitoring point (PMP-1) named as Ambazari Hill-Top Slum is at higher elevations and another critical point (CP2) or PMP-2 named as Telankhedi Slum (CP2) is at lower elevation.
6. Only 30% of the pipelines have been replaced by high-density polyethylene pipe (HDPE) while other pipes have remained as they are and therefore they are prone to leakages.
7. In this particular zone, the demand is very high (i.e. 18 MLD), but the capacity of the ESR is deficient, i.e. 2.27 ML (2,270 m<sup>3</sup>). Therefore, the system is in imbalance at the storage itself. As a result, the bypass line is

provided and hence there is a utilization of the bypass line in the system.

## STEPS FOR DATA COLLECTION AND CALIBRATION OF HYDRAULIC MODEL

### Data collection

For preparation of the hydraulic model of the existing WDN, the network data, demand data and operational data are required. Data pertaining to water demand, water supply and water billed are collected for analysis from the water works department of Nagpur Municipal Corporation and Orange City Water Works (OCW) in India.

### Network data collection

Networks are made up of sources, nodes, links and valves and their data are collected from the water utilities

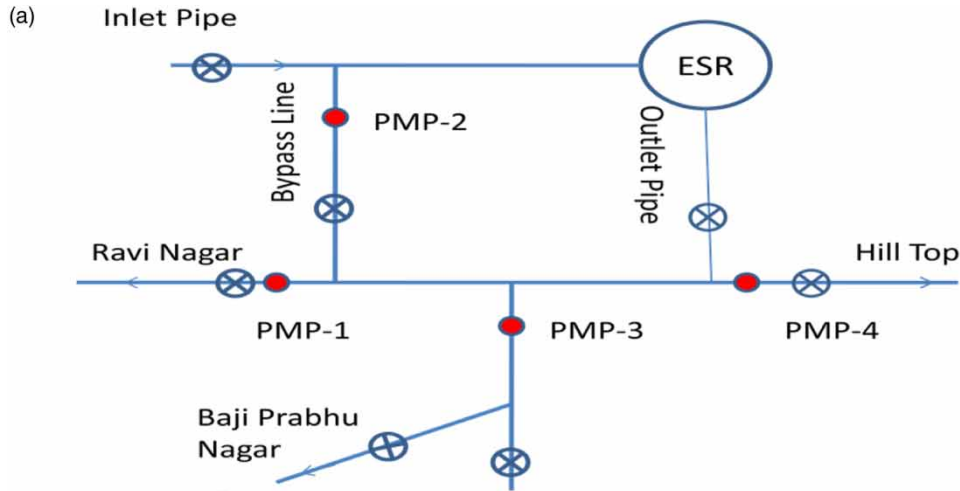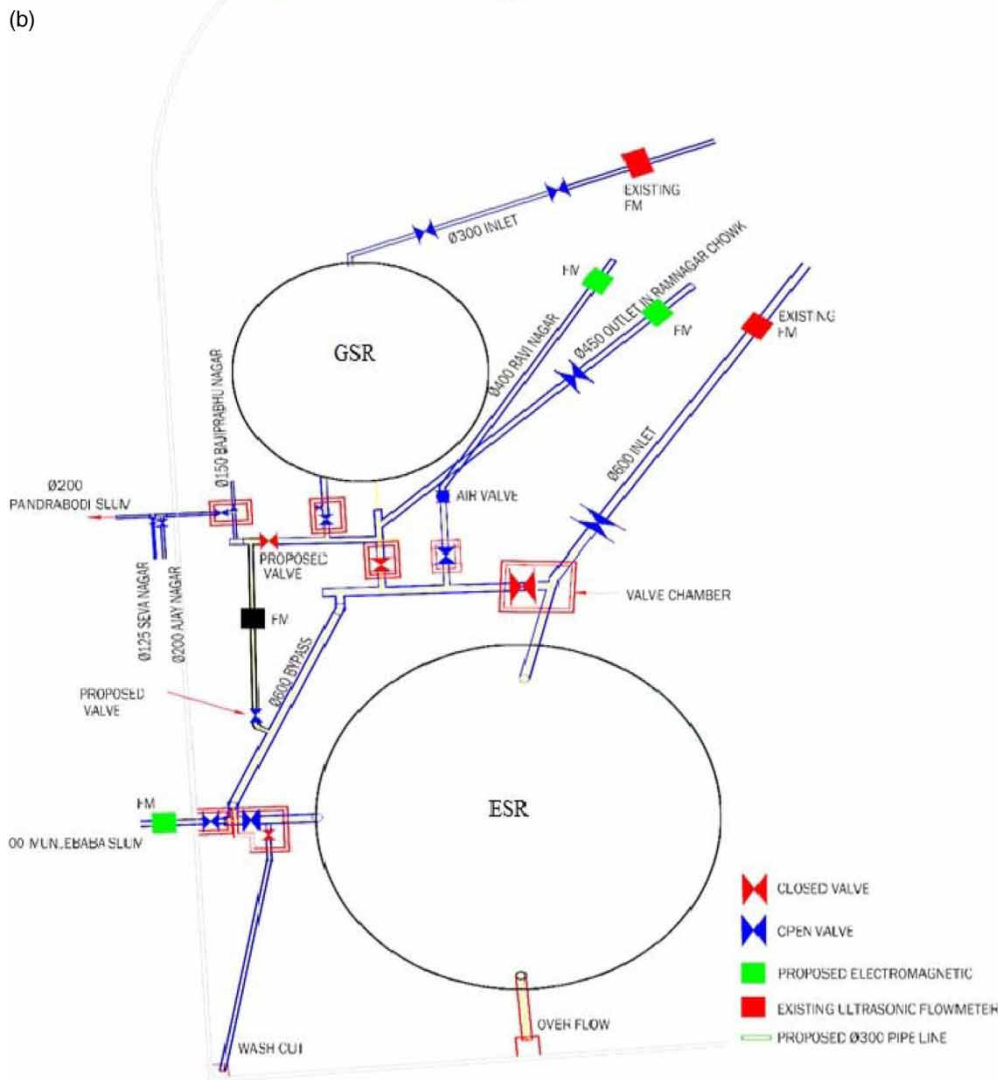

**Figure 2** | (a) Networks having multiple sources, bypass line and from ESR; (b) schematic layout of plan of Ramnagar ESR premises. Please refer to the online version of this paper to see this figure in color: <http://dx.doi.org/10.2166/ws.2020.047>.

(OCW). Data are collected in the geographical information system (GIS) format and are used for preparing the hydraulic model of the WDN. Sources, nodes and valves represent WDN features at specific locations. Network data are mainly composed of pipe and node data.

The base map of the existing WDN gives the details of source, lengths, diameters and material of pipes, and service connection details, and the GIS base contour map for ground elevation is collected from the water utilities. Pipes of different materials such as cast iron, ductile iron and HDPE have been installed at different locations and at different times.

### Source head and supply from source

The elevation of the ESR is 340.930 m. The storage facility is modeled as a reservoir having a capacity of 2.27 ML (2,270 m<sup>3</sup>). The supply rate of the reservoir is measured by installing a digital water meter at the outflow pipe and also the water level in the reservoir is noted.

### Demand data collection

The nodal demands are obtained from consumer usage information, i.e. from billing data. The billing data cover the water usage of a total of 7,254 consumers. Of these, 6,771 are quarterly billed consumers and 483 are monthly billed consumers. The average daily demand is obtained based on the consumer data for three billing cycles for both quarterly and monthly billed consumers. The average daily requirement for the entire water distribution is 16.96 MLD. The consumer data include the consumer index number, meter number, meter installation date, consumer address and meter reading with date. Water demand data are assigned to nodes in the water distribution network model. The water demand is calculated by using the billed consumption plus assessed losses.

### Operational data collection

Operational data describe the actual operating system characteristics at a given time and include the water levels in reservoirs, settings at sluice valves and control policy,

etc. Herein, operational data are obtained from field surveys and from water utilities' operational staff.

Water depth (level) in the reservoir is collected from Supervisory Control and Data Acquisition (SCADA). In India and most of the developing countries, sluice valves are used to control flow by reducing the pressure through throttling instead of a pressure reducing valve (PRV) or flow control valve (FCV). Source details (as mentioned above) such as elevation, lowest supply level (LSL) and head of the ESR and valve details such as location, type, size, timing, total number of threads and number of threads open are obtained from field survey and operational staff, [Table 1](#). Flow at source node and pressure at pre-determined pressure monitoring points (PMPs) are measured and obtained from the field.

### Hydraulic model preparation and initial calibration results

Based on the available data, initially the model is prepared. Each house service connection (HSC) is geographically linked with pipe number using street addresses with plot number in the billing data and location of the consumer meter. Consumer demands are equally distributed to both the junctions and in some situations to the downstream node only. The total system inflow is calculated based on the flow recorded by the flow meter installed on the outlet pipe of the Ramnagar ESR, i.e. at the inlet of the water distribution network. The difference between the average billed water volume per day and daily system inflow is non-revenue water. Non-revenue water is allocated to all junctions considering uniform distribution of losses all along the pipe length. The average nodal demands, including the losses during the period of calibration, are obtained for one cycle, i.e. from the period of May 2017 to July 2017.

The generalized diurnal demand pattern for the entire distribution network is created based on an hourly flow recorded by the flow meter installed on the outlet pipe of the Ramnagar ESR, i.e. at the inlet of the distribution network. The observations of flow from the source and water level in the reservoir on the day of observation (5 January 2018) are given in [Table 2](#). The average flow during the day was 679.74 m<sup>3</sup>/hr. The flow multiplier was obtained for extended period simulation as given in [Table 2](#), since

**Table 1** | List of the valves with operational status during the studies

| Sr no. | Locations                         | Valve no. | Valve located on | Valve type | Size (mm) | Total threads | Threads open | Percentage closed |
|--------|-----------------------------------|-----------|------------------|------------|-----------|---------------|--------------|-------------------|
| 1      | Sudhamnari Slum                   | Iso-141   | PHT-488          | SV         | 100.00    | 24.00         | 22.00        | 8.33              |
| 2      | Sudam Nagri valve                 | Iso-147   | PHT-145          | SV         | 150.00    | 30.00         | CLOSED       | 100.00            |
| 3      | Mahatma Fule Slum valve           | Iso-63    | RNE-219          | SV         | 100.00    | 24.00         | 22.00        | 8.33              |
| 4      | BajiPrabhu Nagar Slum             | Iso-166   | RNE-302          | SV         | 100.00    | 24.00         | 22.00        | 8.33              |
| 5      | Ramnagar LIT Road                 | Iso-216   | RNE-384          | SV         | 100.00    | 24.00         | 22.00        | 8.33              |
| 6      | Nansela Hostel                    | Iso-206   | RNE-397          | SV         | 100.00    | 24.00         | 22.00        | 8.33              |
| 7      | Telkhedi Gondwana Slum valve      | Iso-187   | RNE-344          | SV         | 100.00    | 24.00         | 22.00        | 8.33              |
| 8      | Opp Mangalchal Bagle Home valve   | Iso-112   | RNE-65           | SV         | 150.00    | 30.00         | 28.00        | 6.67              |
| 9      | Telankhedi Shiv                   | Iso-85    | RNE-38           | SV         | 150.00    | 30.00         | 28.00        | 6.67              |
| 10     | PNT Colony                        | Iso-138   | RNE-83           | SV         | 150.00    | 30.00         | 22.00        | 26.70             |
| 11     | Hill Top valve                    | Iso-176   | RNE-455          | SV         | 100.00    | 24.00         | 22.00        | 8.33              |
| 12     | Pandrabodi near house             | Iso-43    | RNE-33           | SV         | 200.00    | 36.00         | 34.00        | 5.56              |
| 13     | Hill Top MSCP Office              | Iso-185   | RNE-182          | SV         | 125.00    | 27.00         | CLOSED       | 100.00            |
| 14     | DOUBLE (ON Sr no. 17)             | Iso-94    | RNE-404          | SV         | 100.00    | 24.00         | 22.00        | 8.33              |
| 15     | Pandhrabodi Slum                  | Iso-146   | RNE-138          | SV         | 125.00    | 27.00         | 25.00        | 7.41              |
| 16     | Shubhamkar Apartment              | Iso-171   | RNE-303          | SV         | 100.00    | 24.00         | CLOSED       | 100.00            |
| 17     | Ambazari Tekadi                   | Iso-94    | RNE-141          | SV         | 250.00    | 42.00         | 40.00        | 4.76              |
| 18     | Ambazari Tekadi                   | Iso-65    | RNE-52           | SV         | 150.00    | 30.00         | 28.00        | 6.67              |
| 19     | Law square valve                  | Iso-22    | RNE-578          | SV         | 250.00    | 42.00         | 40.00        | 4.76              |
| 20     | Munje baba layout                 | Iso-66    | RNE-289          | SV         | 150.00    | 30.00         | 28.00        | 6.67              |
| 21     | Hindustan Colony                  | Iso-136   | PHT-208          | SV         | 125.00    | 27.00         | 25.00        | 7.41              |
| 22     | Futala Square                     | Iso-10    | PHT-24           | SV         | 300.00    | 48.00         | CLOSED       | 100.00            |
| 23     | Bharat Nagar Near Sapphire Colony | Iso-83    | PHT-229          | SV         | 125.00    | 27.00         | 25.00        | 7.41              |
| 24     | Amravati Road Bharat Nagar valve  | Iso-84    | PHT-111          | SV         | 150.00    | 30.00         | 28.00        | 6.67              |
| 25     | Bharat Nagar                      | Iso-39    | PHT-192          | SV         | 150.00    | 30.00         | 28.00        | 6.67              |
| 26     | Ganesh Tower                      | Iso-111   | PHT-185          | SV         | 150.00    | 30.00         | 28.00        | 6.67              |
| 27     | Ramnagar Busstop                  | Iso-40    | RNE-30           | SV         | 200.00    | 36.00         | 26.00        | 27.78             |
| 28     | Mochiwala valve                   | Iso-33    | RNE-32           | SV         | 200.00    | 36.00         | 22.00        | 38.89             |
| 29     | Opposite Sony Centre              | Iso-114   | RNE-163          | SV         | 125.00    | 27.00         | 25.00        | 7.41              |
| 30     | Dhande Hospital                   | Iso-58    | RNE-237          | SV         | 125.00    | 27.00         | 25.00        | 7.41              |
| 31     | Opposite Sony Centre              | Iso-68    | RNE-104          | SV         | 150.00    | 30.00         | 2.00         | 93.33             |
| 32     | Tilak Nagar valve                 | Iso-77    | RNE-270          | SV         | 125.00    | 27.00         | 20.00        | 25.93             |
| 33     | Mansi Girls Hostel                | Iso-210   | RNE-363          | SV         | 100.00    | 24.00         | 16.00        | 33.33             |
| 34     | Bhole petrol pump                 | Iso-25    | RNE-80           | SV         | 200.00    | 36.00         | 10.00        | 72.22             |
| 35     | Bhole petrol pump valve           | Iso-302   | RNE-171          | SV         | 150.00    | 30.00         | CLOSED       | 100.00            |
| 36     | Bhole petrol pump valve           | Iso-59    | RNE-158          | SV         | 150.00    | 30.00         | 28.00        | 6.67              |
| 37     | Vasantrao Naiyak valve            | Iso-292   | RNE-1615         | SV         | 150.00    | 30.00         | 28.00        | 6.67              |
| 38     | Near Gokulpeth Old Office         | Iso-174   | RNE-116          | SV         | 100.00    | 24.00         | 16.00        | 33.33             |
| 39     | Ramnagar Square                   | Iso-38    | RNE-26           | SV         | 225.00    | 39.00         | 37.00        | 5.13              |

*(continued)*

Table 1 | continued

| Sr no. | Locations                           | Valve no. | Valve located on | Valve type | Size (mm) | Total threads | Threads open | Percentage closed |
|--------|-------------------------------------|-----------|------------------|------------|-----------|---------------|--------------|-------------------|
| 40     | Ambazari Layout valve               | Iso-62    | RNE-121          | SV         | 150.00    | 30.00         | 28.00        | 6.67              |
| 41     | Yeshwant Nagar valve                | Iso-199   | RNE-450          | SV         | 100.00    | 24.00         | 22.00        | 8.33              |
| 42     | Yeshwant Nagar valve                | Iso-54    | RNE-49           | SV         | 150.00    | 30.00         | 28.00        | 6.67              |
| 43     | Verma Layout Part I                 | Iso-190   | RNE-202          | SV         | 100.00    | 24.00         | 22.00        | 8.33              |
| 44     | Verma Layout Part I                 | Iso-189   | RNE-259          | SV         | 100.00    | 24.00         | 22.00        | 8.33              |
| 45     | Vera Layout                         | Iso-232   | RNE-489          | SV         | 80.00     | 18.00         | 16.00        | 11.11             |
| 46     | Ambazari Garden                     | Iso-291   | RNE-21           | SV         | 250.00    | 42.00         | 18.00        | 57.14             |
| 47     | Futala Command Area                 | Iso-93    | RNE-203          | SV         | 100.00    | 24.00         | 10.00        | 58.33             |
| 48     | Pandrabodi Mata Mandir valve        | Iso-194   | RNE-404          | SV         | 100.00    | 24.00         | 16.00        | 33.33             |
| 49     | Bajjiprabhu Nagar valve             | Iso-102   | RNE-125          | SV         | 150.00    | 30.00         | CLOSED       | 100.00            |
| 50     | Sanjay Nagar Single gali            | Iso-298   | RNE-1634         | SV         | 150.00    | 30.00         | 28.00        | 6.67              |
| 51     | Ramnar Square                       | Iso-97    | RNE-86           | SV         | 150.00    | 30.00         | 28.00        | 6.67              |
| 52     | Ramnagar Square                     | Iso-207   | RNE-354          | SV         | 100.00    | 24.00         | 22.00        | 8.33              |
| 53     | Ramnagar Prabhat restaurant         | Iso-214   | RNE-311          | SV         | 100.00    | 24.00         | 22.00        | 8.33              |
| 54     | Mahatoli opp suryavanshi decoration | Iso-196   | RNE-216          | SV         | 100.00    | 24.00         | 22.00        | 8.33              |
| 55     | Mashid Road                         | Iso-217   | RNE-271          | SV         | 100.00    | 24.00         | 22.00        | 8.33              |
| 56     | Nayarsan office valve               | Iso-113   | RNE-183          | SV         | 125.00    | 27.00         | 25.00        | 7.41              |
| 57     | Nayarsan office valve               | Iso-100   | RNE-172          | SV         | 100.00    | 24.00         | 2.00         | 91.67             |
| 58     | Opp Gokulpeth (Khabadi Store)       | Iso-221   | RNE-360          | SV         | 100.00    | 24.00         | 22.00        | 8.33              |
| 59     | Kumar Bekri valve                   | Iso-226   | RNE-241          | SV         | 100.00    | 24.00         | 22.00        | 8.33              |
| 60     | Kumar Bekri valve                   | Iso-163   | RNE-359          | SV         | 100.00    | 24.00         | 22.00        | 8.33              |
| 61     | Ravi Nagar Cement Road              | Iso-121   | RNE-113          | SV         | 150.00    | 30.00         | 20.00        | 33.33             |
| 62     | Valmiki Nagar                       | Iso-67    | RNE-155          | SV         | 150.00    | 30.00         | 28.00        | 6.67              |
| 63     | Gokul peth Canal Road               | Iso-86    | RNE-91           | SV         | 150.00    | 30.00         | CLOSED       | 100.00            |
| 64     | Tilak Nagar                         | Iso-164   | PHT-537          | SV         | 100.00    | 24.00         | CLOSED       | 100.00            |
| 65     | Near Girls Hostel Tilka             | Iso-211   | PHT-96           | SV         | 150.00    | 30.00         | 28.00        | 6.67              |
| 66     | Bharat Nagar                        | Iso-64    | PHT-167          | SV         | 150.00    | 30.00         | 28.00        | 6.67              |
| 67     | Bharat Nagar                        | Iso-23    | PHT-26           | SV         | 300.00    | 48.00         | 46.00        | 4.17              |
| 68     | Bharat Nagar                        | Iso-225   | PHT-382          | SV         | 100.00    | 24.00         | 22.00        | 8.33              |
| 69     | Ramnagar ESR outlet                 | Iso-1     | RNE-1            | BV         | 600.00    | 96.00         | 94.00        | 2.08              |

most of the time, water is supplied by bypass line only and the ESR is used for withdrawing water for far fewer hours. Further water levels in the reservoir were noted to obtain the hydraulic grade line (HGL) at the source. Also, the HGL multiplier of the source was obtained as shown in Table 2. For calibration, it is necessary to assign the Hazen–Williams (HW) coefficient value initially. Therefore, pipes are grouped on the basis of pipe material and age of

installation in years, and initial assigned values of the HW coefficients are shown in Table 3.

Measurement of the pipe flow at the source using a flow meter (FM) and pressure measurements at two locations PMP-1, i.e. Ambazari Hill-Top Slum (CP1) and PMP-2, i.e. Telankhedi Slum (CP2), were carried out and readings are shown in Table 2 and Figure 1. An FM was installed at the entry point of the water distribution network for measuring



**Table 2** | Flow and observation of pressures at salient points on 5 January 2018

| Date       | Time  | Flow   | Flow multiplier | Level in tank (m) | HGL (m) | HGL multiplier | Observed pressure   |                        |
|------------|-------|--------|-----------------|-------------------|---------|----------------|---------------------|------------------------|
|            |       |        |                 |                   |         |                | PMP-1 (Ambazari CP) | PMP-2 (Telankhedhi CP) |
| (1)        | (2)   | (3)    | (4)             | (5)               | (6)     | (7)            | (8)                 | (9)                    |
| 05/01/2018 | 0:00  | 471.97 | 0.694           | 2.05              | 342.98  | 1.0060         | 4.41                | 7.91                   |
| 05/01/2018 | 1:00  | 474.87 | 0.699           | 2.05              | 342.98  | 1.0060         | 5.36                | 8.72                   |
| 05/01/2018 | 2:00  | 456.25 | 0.671           | 2.05              | 342.98  | 1.0060         | 5.23                | 8.62                   |
| 05/01/2018 | 3:00  | 452.59 | 0.666           | 2.03              | 342.96  | 1.0060         | 5.43                | 8.76                   |
| 05/01/2018 | 4:00  | 479.14 | 0.705           | 2.03              | 342.96  | 1.0060         | 6.56                | 9.81                   |
| 05/01/2018 | 5:00  | 674.31 | 0.992           | 2.02              | 342.95  | 1.0059         | 10.62               | 14.13                  |
| 05/01/2018 | 6:00  | 678.12 | 0.998           | 2.03              | 342.96  | 1.0060         | 7.58                | 11.02                  |
| 05/01/2018 | 7:00  | 923.18 | 1.358           | 2.02              | 342.95  | 1.0059         | 7.02                | 10.00                  |
| 05/01/2018 | 8:00  | 763.57 | 1.123           | 2                 | 342.93  | 1.0059         | 3.70                | 5.83                   |
| 05/01/2018 | 9:00  | 782.95 | 1.152           | 1.99              | 342.92  | 1.0058         | 2.39                | 3.55                   |
| 05/01/2018 | 10:00 | 718.56 | 1.057           | 1.99              | 342.92  | 1.0058         | 0.67                | 1.86                   |
| 05/01/2018 | 11:00 | 641.04 | 0.943           | 1.97              | 342.90  | 1.0058         | 1.80                | 1.70                   |
| 05/01/2018 | 12:00 | 686.82 | 1.010           | 1.95              | 342.88  | 1.0057         | 0.47                | -0.41                  |
| 05/01/2018 | 13:00 | 731.53 | 1.076           | 1.94              | 342.87  | 1.0057         | 4.80                | 2.96                   |
| 05/01/2018 | 14:00 | 740.23 | 1.089           | 1.93              | 342.86  | 1.0057         | 4.80                | 1.59                   |
| 05/01/2018 | 15:00 | 750.3  | 1.104           | 1.92              | 342.85  | 1.0056         | 5.41                | 2.11                   |
| 05/01/2018 | 16:00 | 789.21 | 1.161           | 1.91              | 342.84  | 1.0056         | 5.57                | 5.25                   |
| 05/01/2018 | 17:00 | 751.67 | 1.106           | 1.9               | 342.83  | 1.0056         | 5.53                | 5.37                   |
| 05/01/2018 | 18:00 | 749.38 | 1.102           | 1.9               | 342.83  | 1.0056         | 5.72                | 5.59                   |
| 05/01/2018 | 19:00 | 777.76 | 1.144           | 1.91              | 342.84  | 1.0056         | 5.82                | 5.82                   |
| 05/01/2018 | 20:00 | 742.97 | 1.093           | 1.62              | 342.55  | 1.0048         | 8.28                | 9.57                   |
| 05/01/2018 | 21:00 | 704.67 | 1.037           | 1.08              | 342.01  | 1.0032         | 8.23                | 10.08                  |
| 05/01/2018 | 22:00 | 837.28 | 1.232           | 1.01              | 341.94  | 1.0030         | 8.32                | 10.78                  |
| 05/01/2018 | 23:00 | 743.28 | 1.093           | 1.03              | 341.96  | 1.0030         | 8.07                | 11.01                  |
| 05/01/2018 | 0:00  | 471.97 | 0.694           | 2.05              | 342.98  | 1.0060         | 8.91                | 12.01                  |

**Table 3** | Assumed value of Hazen-Williams coefficients

| Pipe material               | Assigned group no. | No. of pipes in group | Age of installation in years | Assigned Hazen-Williams c-value |
|-----------------------------|--------------------|-----------------------|------------------------------|---------------------------------|
| Cast iron & galvanized iron | 1                  | 29                    | >30                          | 85                              |
| Cast iron                   | 2                  | 361                   | <30                          | 100                             |
| Cast iron                   | 3                  | 4                     | <10                          | 130                             |
| Ductile iron                | 4                  | 24                    | <10                          | 125                             |
| HDPE                        | 5                  | 315                   | <10                          | 135                             |

inflow, and pressure data loggers were placed to record hourly pressure readings for 24 hours on the same day.

Water level variation information of the reservoir is acquired from the SCADA system for the same day. Based on the collected data, the hydraulic pattern of the reservoir or hydraulic grade line (HGL) and demand for the demand junctions were created. Total inflow to the network is worked out as 16.960 MLD. The difference between the inflow and billed water volume of the network is worked out as 6.307 MLD, known as non-revenue water (NRW), which is calculated as 37%. Thus, the NRW of 0.165 lps is uniformly allocated to all non-slum junctions.

The initial comparison of modeled and observed pressures at the two predetermined pressure monitoring points PMP-1 and PMP-2 is shown in Figure 3. The assumed

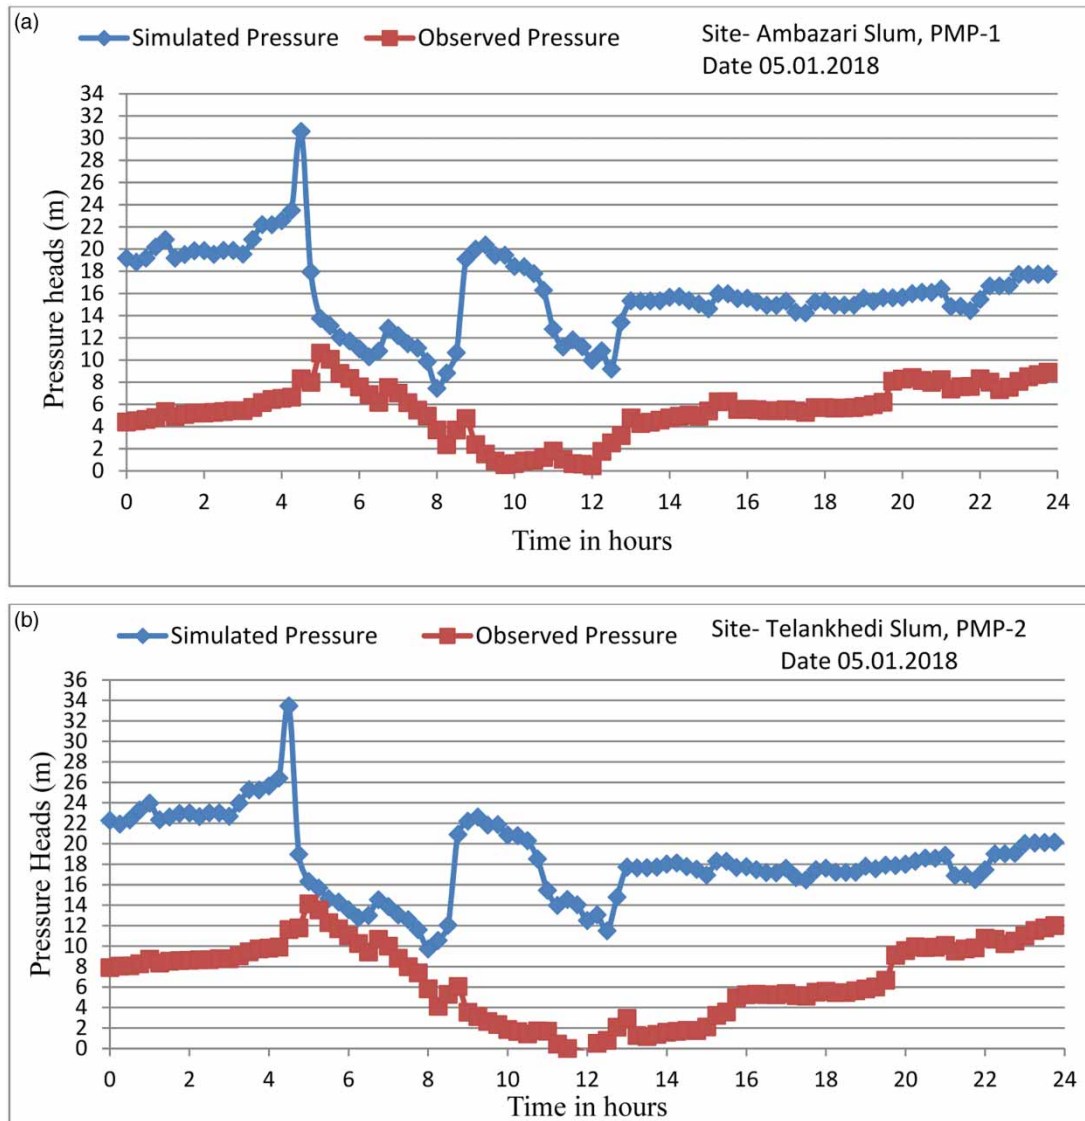

**Figure 3** | Comparison of computed (simulated) pressure with observed pressure at both CP: (a) Ambazari Hill-Top Slum (PMP-1/CP1), (b) Telankhedi Slum (PMP-2/CP2).

values of HW-coefficients (C) for the five groups are 85, 100, 130, 125, and 135 as shown in Table 3. It is observed that the measured field pressures at both the PMPs are quite different than the simulated model pressure. These observations are considered without valve inclusions.

### Validation, hydraulic model improvements and micro-level calibration

Observed pressure is measured at two predefined PMPs named as Ambazari critical point (CP) and Telankhedi

CP in the study area. From the initial calibration results (Figure 3), it is observed that there is a large pressure difference between simulated and observed pressures at both the PMPs. Therefore, the data are validated from field survey and physical verification.

Data collected of existing WDN (pipes, valves, source), demand-node-related data, and consumer data of the identified zone were verified by physical survey for any erroneous pipe lengths, diameters and materials, node elevations, demand and operational zoning. Further, data will be verified again from the field in case of doubts.

After the field survey and data collection from the municipal authority, various errors are observed such as pipe materials, pipe diameters, missing links and nodes, wrongly added pipes and valve operational status of valve settings, nodal elevations and demands. Ramnagar ESR operational water distribution network and its coverage were collected from the site. These errors are now incorporated and the model is accurately corrected with an acceptable accuracy.

Ramnagar ESR operational WDN and its coverage were collected from the water utility. Initially, it was supplying water to the 33 sub-zones as mentioned in the study area and network details section. After surveying and discussion with the authority, it was found that the supply from Ramnagar ESR is in 38 sub-zones as shown in Figure 4.

#### MICRO-LEVEL OF CALIBRATION OF THE MODEL

Even from the macro-level of calibration, an observed large pressure difference between simulated and observed pressures at both the PMPs is still observed. Therefore, for minimizing the pressure difference at both the PMPs, six pressure loggers are installed, two at PMPs (pre-defined critical monitoring points, i.e. already existing) and four in the

Ramnagar ESR premises area since there are four main pipelines emerging from Ramnagar ESR, as shown in Figure 2. All pressure loggers are located before valves and are shown by red colors (Figure 2(a)). Further, it is observed that one of the PMPs (Ambazari CP) is on the Ambazari Hill Top line and another CP (Telankhedi CP) is on the Ravi Nagar line. The Ambazari Hill Top line is at a higher elevation and the Ravi Nagar line is at a lower elevation. Two main valves are operated on the ESR premises. One is on the Ravi Nagar line and another is on the Ambazari Hill Top line. According to field observations, the valve settings are provided for both the valves which are on the Ambazari Hill Top line and Ravi Nagar line.

Pressure readings from different pressure loggers installed at different points on the ESR premises and two PMPs (i.e. at six different locations) are taken on a number of days. For two to three months continuously the systems are observed and readings are taken in every three to four days so as to obtain good data sets for calibration. From the huge database, readings are observed on specific days, say on 22 April 2018 to 5 May 2018, and many more days on both pressure loggers installed at the PMPs and it is noted that negative pressures are observed at both PMPs at specific durations on all the days. Negative pressure

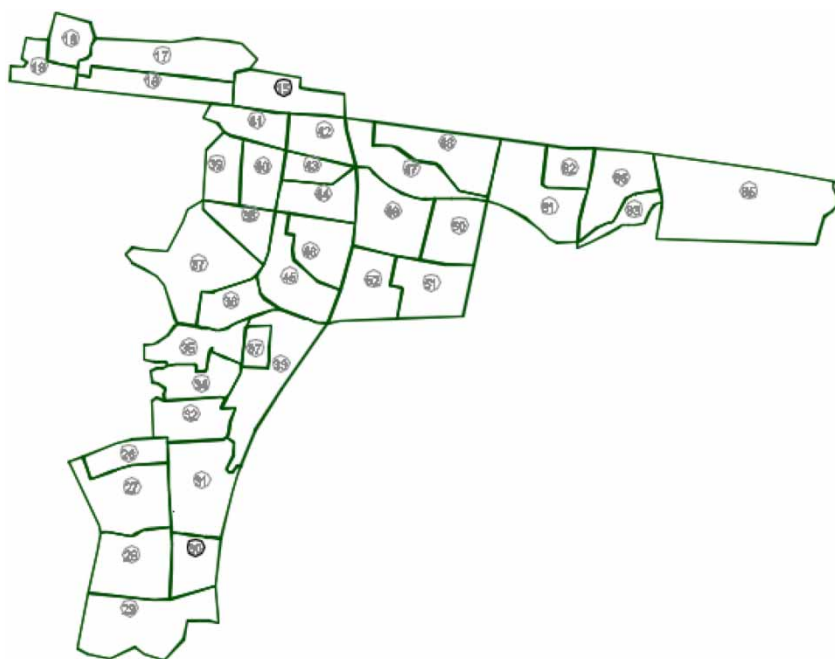

Figure 4 | Ramnagar ESR operational hydraulic zone showing 38 sub-zones.

readings on the particular day of 28 October 2018 at both the PMPs are discussed. It is observed that on 28 May 2018 at Ambazari critical point, at times 0 am to 4.30 am, and 10.15 am to 15.30 pm, and from 22.45 pm to 24 pm and at Telakhedi critical point, at times 1.30 am to 16.15 pm and from 15.30 pm to 23.15 pm negative pressures are observed in the field. The reason identified is that the source itself is deficient and therefore after discussion with water utilities such as NMC and OCW, the inlet flow of the system is increased to 18.5 MLD. With this increased flow, the system is evaluated and now everywhere positive pressures are obtained in the systems. Based on observations taken from the huge data of readings, the best observation day is selected based on no power cut and good observed pressure readings on both PMPs. The day of observation and the best day is selected as 31 October 2018.

## RESULTS AND DISCUSSION

Figure 5 shows the readings of four pressure loggers installed at different points on the Ramnagar ESR premises and their nearest points. Graphs in Figure 5 show that the system is calibrated at four points at the ESR premises with observed readings on 31 October 2018.

The generalized diurnal demand pattern is again created based on an hourly flow recorded by the flow meter installed on the outlet pipe of the Ramnagar ESR, i.e. at the inlet of the distribution network. The observations of flow from the source and the water level in the reservoir on the day of observation (31 October 2018) are given in Table 4. The average flow during the day was  $734.14 \text{ m}^3/\text{h}$ . Pressure logger readings are noted at every 15 minutes. Flow multipliers were obtained for extended period simulation as given in Table 4, since most of the time, water is supplied by bypass line only and the ESR is used for withdrawing water for much less of the time. Further water levels in the reservoir were noted to obtain the hydraulic grade line (HGL) at the source. In addition, the HGL multiplier of the source was obtained as shown in Table 4.

Water level variation information of the reservoir is acquired from SCADA system for the same day, i.e. 31 October 2018. Based on the collected data, the hydraulic pattern of reservoir HGL and demand for the demand junctions

were created. Total inflow to the network is increased and considered as 18.5 MLD. The difference between inflow and billed water volume of the network is worked out as 6.552 MLD, known as non-revenue water, which is calculated as 37%. Thus, non-revenue water (NRW) of 0.123 lps is uniformly allocated to all non-slum junctions.

After model simulation and micro-calibration, again the comparison of modeled and observed pressures at the two predetermined pressure monitoring points PMP-1 and PMP-2 is done and the results are shown in Figure 6.

From Figure 6(a), it is observed that the difference between observed and simulated pressure is small for Ambazari Hill-Top Slum (PMP-1/CP1) and the maximum difference observed is 4.137 m and 4.034 m at times 20.15 pm and 20.30 pm, respectively, and at the rest of the times the pressure difference is much less, about 1 to 2 metres. Figure 6(b) shows the results for Telankhedi Slum (PMP-2/CP2). It shows that at times 0 am to 6.15 am, minimum and maximum pressure difference between observed and simulated pressure ranges from 1.836 m to 4.386 m, at times 6.30 am to 7.45 am, pressure values range from 4.738 m to 6.177 m, and pressure values are less for times 8 am to 21 pm and range from 0.812 m to 2.762 m. At times 21.15 pm to 22 pm, values lie between 2.082 m and 3.464 m, however, this difference is high during the period from 22.15 pm to 23.15 pm and the values range between 6.085 m and 8.337 m. A little lower difference is observed at times 23.30 pm to 23.45 pm, the pressure values ranging between 4.384 m and 5.616 m.

Looking at this and from Figure 6, it is observed that little effort again is required for best matching the graph at PMP-2. However, one can use the model for various purposes for design, analysis, and operation of water distribution systems.

## SUMMARY AND CONCLUSIONS

Calibration of water distribution is a challenging task for large real water distribution systems. In this paper, a case study of the water distribution network of Ramnagar Elevated Service Reservoir (ESR) which is a part of Demo Zone of Nagpur City located in Maharashtra State of India is considered for calibration. This paper describes

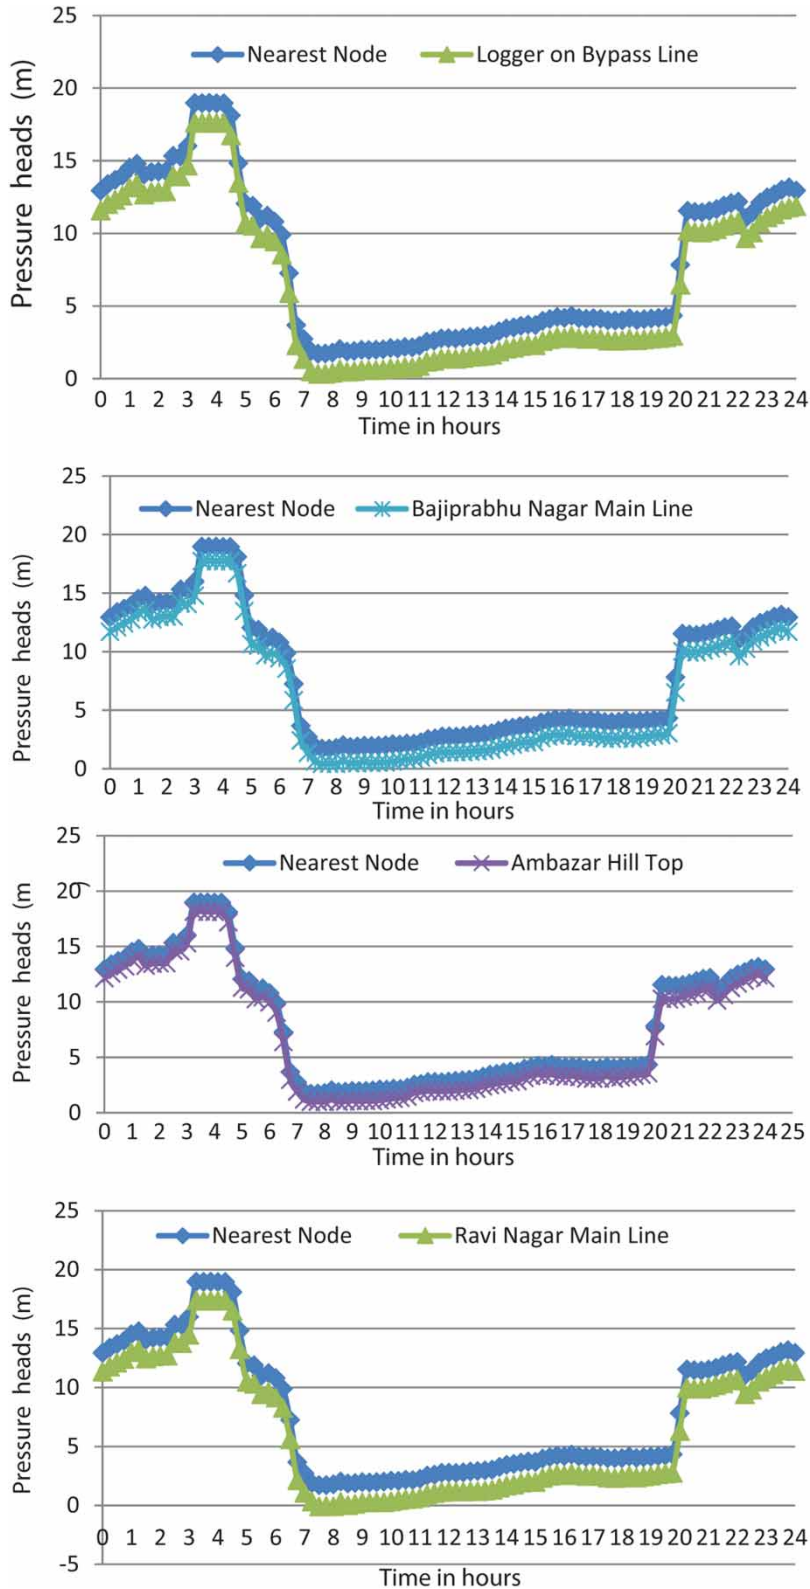

Figure 5 | Comparison of readings of pressure loggers at four main lines emerging from Ramnagar ESR and nearest points.

**Table 4** | Flow and observation of pressures at critical points on 31 October 2018

| Date       | Time  | Flow    | Flow multiplier | HGL (m) | HGL multiplier | Observed pressure   |                        |
|------------|-------|---------|-----------------|---------|----------------|---------------------|------------------------|
|            |       |         |                 |         |                | PMP-1 (Ambazari CP) | PMP-2 (Telankhedhi CP) |
| 31-10-2018 | 00:00 | 606.098 | 0.826           | 340.99  | 1.0351         | 14.13               | 16.57                  |
| 31-10-2018 | 00:15 | 623.951 | 0.850           | 341.44  | 1.0365         | 14.64               | 17.07                  |
| 31-10-2018 | 00:30 | 601.367 | 0.819           | 341.73  | 1.0373         | 15.06               | 17.4                   |
| 31-10-2018 | 00:45 | 636.769 | 0.867           | 342.02  | 1.0382         | 15.34               | 17.81                  |
| 31-10-2018 | 01:00 | 655.538 | 0.893           | 342.58  | 1.0399         | 15.95               | 18.36                  |
| 31-10-2018 | 01:15 | 594.348 | 0.810           | 342.84  | 1.0407         | 16.18               | 18.55                  |
| 31-10-2018 | 01:30 | 592.517 | 0.807           | 342.1   | 1.0385         | 15.43               | 17.96                  |
| 31-10-2018 | 01:45 | 614.643 | 0.837           | 342.27  | 1.0390         | 15.59               | 18.16                  |
| 31-10-2018 | 02:00 | 601.215 | 0.819           | 342.3   | 1.0391         | 15.58               | 18.2                   |
| 31-10-2018 | 02:15 | 605.182 | 0.824           | 342.32  | 1.0391         | 15.55               | 18.24                  |
| 31-10-2018 | 02:30 | 748.924 | 1.020           | 343.4   | 1.0424         | 16.6                | 19.25                  |
| 31-10-2018 | 02:45 | 708.029 | 0.964           | 343.35  | 1.0423         | 16.51               | 19.16                  |
| 31-10-2018 | 03:00 | 995.972 | 1.357           | 344.1   | 1.0445         | 17.14               | 19.8                   |
| 31-10-2018 | 03:15 | 780.926 | 1.064           | 347.05  | 1.0535         | 19.94               | 22.46                  |
| 31-10-2018 | 03:30 | 780.926 | 1.064           | 347.04  | 1.0535         | 20.01               | 22.47                  |
| 31-10-2018 | 03:45 | 780.926 | 1.064           | 347.06  | 1.0535         | 20.07               | 22.5                   |
| 31-10-2018 | 04:00 | 780.926 | 1.064           | 347.03  | 1.0534         | 20.12               | 22.49                  |
| 31-10-2018 | 04:15 | 891.293 | 1.214           | 347.04  | 1.0535         | 20.09               | 22.31                  |
| 31-10-2018 | 04:30 | 701.773 | 0.956           | 346.17  | 1.0508         | 19.32               | 21.24                  |
| 31-10-2018 | 04:45 | 811.640 | 1.106           | 342.9   | 1.0409         | 16.35               | 18.2                   |
| 31-10-2018 | 05:00 | 821.558 | 1.119           | 340.12  | 1.0324         | 13.69               | 15.49                  |
| 31-10-2018 | 05:15 | 822.779 | 1.121           | 339.95  | 1.0319         | 13.45               | 15.33                  |
| 31-10-2018 | 05:30 | 877.712 | 1.196           | 339.08  | 1.0293         | 12.61               | 14.19                  |
| 31-10-2018 | 05:45 | 885.037 | 1.206           | 339.29  | 1.0299         | 12.53               | 14                     |
| 31-10-2018 | 06:00 | 907.315 | 1.236           | 338.87  | 1.0287         | 11.96               | 13.38                  |
| 31-10-2018 | 06:15 | 946.226 | 1.289           | 337.97  | 1.0259         | 10.77               | 12.22                  |
| 31-10-2018 | 06:30 | 770.135 | 1.049           | 335.31  | 1.0178         | 8.19                | 9.24                   |
| 31-10-2018 | 06:45 | 810.419 | 1.104           | 331.72  | 1.0070         | 4.99                | 5.82                   |
| 31-10-2018 | 07:00 | 795.618 | 1.084           | 330.77  | 1.0041         | 4.03                | 4.59                   |
| 31-10-2018 | 07:15 | 800.500 | 1.090           | 329.93  | 1.0015         | 3.35                | 4.08                   |
| 31-10-2018 | 07:30 | 762.352 | 1.038           | 329.76  | 1.0010         | 3.17                | 3.49                   |
| 31-10-2018 | 07:45 | 767.083 | 1.045           | 329.77  | 1.0010         | 3.18                | 2.7                    |
| 31-10-2018 | 08:00 | 762.505 | 1.039           | 329.83  | 1.0012         | 3.17                | 1.82                   |
| 31-10-2018 | 08:15 | 742.820 | 1.012           | 330.07  | 1.0019         | 3.28                | 1.58                   |
| 31-10-2018 | 08:30 | 749.687 | 1.021           | 329.9   | 1.0014         | 3.15                | 0.62                   |
| 31-10-2018 | 08:45 | 760.674 | 1.036           | 329.94  | 1.0015         | 3.11                | 0.31                   |
| 31-10-2018 | 09:00 | 778.680 | 1.061           | 330.02  | 1.0018         | 3.22                | 0.2                    |
| 31-10-2018 | 09:15 | 767.693 | 1.046           | 330     | 1.0017         | 3.21                | 0.16                   |

*(continued)*

Table 4 | continued

| Date       | Time  | Flow    | Flow multiplier | HGL (m) | HGL multiplier | Observed pressure   |                        |
|------------|-------|---------|-----------------|---------|----------------|---------------------|------------------------|
|            |       |         |                 |         |                | PMP-1 (Ambazari CP) | PMP-2 (Telankhedhi CP) |
| 31-10-2018 | 09:30 | 776.086 | 1.057           | 330.02  | 1.0018         | 3.16                | 0.23                   |
| 31-10-2018 | 09:45 | 766.015 | 1.043           | 330.06  | 1.0019         | 3.2                 | 0.37                   |
| 31-10-2018 | 10:00 | 777.764 | 1.059           | 330.15  | 1.0022         | 3.26                | 0.51                   |
| 31-10-2018 | 10:15 | 788.446 | 1.074           | 330.12  | 1.0021         | 3.33                | 0.66                   |
| 31-10-2018 | 10:30 | 782.189 | 1.065           | 330.22  | 1.0024         | 3.45                | 0.77                   |
| 31-10-2018 | 10:45 | 780.663 | 1.063           | 330.19  | 1.0023         | 3.45                | 0.89                   |
| 31-10-2018 | 11:00 | 758.690 | 1.033           | 330.3   | 1.0026         | 3.63                | 1.02                   |
| 31-10-2018 | 11:15 | 752.739 | 1.025           | 330.58  | 1.0035         | 3.97                | 1.39                   |
| 31-10-2018 | 11:30 | 771.508 | 1.051           | 330.65  | 1.0037         | 4.03                | 1.63                   |
| 31-10-2018 | 11:45 | 758.232 | 1.033           | 330.81  | 1.0042         | 4.15                | 1.73                   |
| 31-10-2018 | 12:00 | 758.843 | 1.034           | 330.82  | 1.0042         | 4.13                | 1.86                   |
| 31-10-2018 | 12:15 | 764.031 | 1.041           | 330.79  | 1.0041         | 4.14                | 1.91                   |
| 31-10-2018 | 12:30 | 740.684 | 1.009           | 330.85  | 1.0043         | 4.2                 | 2.08                   |
| 31-10-2018 | 12:45 | 750.298 | 1.022           | 330.92  | 1.0045         | 4.25                | 2.08                   |
| 31-10-2018 | 13:00 | 755.943 | 1.030           | 330.96  | 1.0046         | 4.28                | 2.14                   |
| 31-10-2018 | 13:15 | 741.752 | 1.010           | 331.01  | 1.0048         | 4.36                | 2.13                   |
| 31-10-2018 | 13:30 | 752.892 | 1.026           | 331.08  | 1.0050         | 4.44                | 2.26                   |
| 31-10-2018 | 13:45 | 740.837 | 1.009           | 331.3   | 1.0057         | 4.72                | 2.55                   |
| 31-10-2018 | 14:00 | 757.012 | 1.031           | 331.49  | 1.0063         | 4.88                | 2.79                   |
| 31-10-2018 | 14:15 | 754.112 | 1.027           | 331.56  | 1.0065         | 4.95                | 2.96                   |
| 31-10-2018 | 14:30 | 745.567 | 1.016           | 331.68  | 1.0068         | 5.1                 | 3.16                   |
| 31-10-2018 | 14:45 | 748.619 | 1.020           | 331.76  | 1.0071         | 5.19                | 3.39                   |
| 31-10-2018 | 15:00 | 722.373 | 0.984           | 331.73  | 1.0070         | 5.22                | 3.42                   |
| 31-10-2018 | 15:15 | 747.703 | 1.018           | 332.02  | 1.0079         | 5.53                | 3.89                   |
| 31-10-2018 | 15:30 | 744.041 | 1.013           | 332.14  | 1.0082         | 5.64                | 4.16                   |
| 31-10-2018 | 15:45 | 742.058 | 1.011           | 332.29  | 1.0087         | 5.69                | 4.43                   |
| 31-10-2018 | 16:00 | 730.155 | 0.995           | 332.22  | 1.0085         | 5.61                | 4.45                   |
| 31-10-2018 | 16:15 | 751.823 | 1.024           | 332.37  | 1.0089         | 5.7                 | 4.25                   |
| 31-10-2018 | 16:30 | 739.006 | 1.007           | 332.21  | 1.0084         | 5.57                | 3.9                    |
| 31-10-2018 | 16:45 | 743.736 | 1.013           | 332.16  | 1.0083         | 5.48                | 3.95                   |
| 31-10-2018 | 17:00 | 765.557 | 1.043           | 332.2   | 1.0084         | 5.49                | 4.07                   |
| 31-10-2018 | 17:15 | 746.788 | 1.017           | 332.16  | 1.0083         | 5.4                 | 3.87                   |
| 31-10-2018 | 17:30 | 743.431 | 1.013           | 332.05  | 1.0080         | 5.29                | 3.81                   |
| 31-10-2018 | 17:45 | 760.063 | 1.035           | 332.04  | 1.0079         | 5.26                | 3.85                   |
| 31-10-2018 | 18:00 | 766.778 | 1.044           | 332.06  | 1.0080         | 5.28                | 3.85                   |
| 31-10-2018 | 18:15 | 746.635 | 1.017           | 332.19  | 1.0084         | 5.44                | 4.1                    |
| 31-10-2018 | 18:30 | 738.243 | 1.006           | 332.07  | 1.0080         | 5.3                 | 3.97                   |
| 31-10-2018 | 18:45 | 730.613 | 0.995           | 332.13  | 1.0082         | 5.38                | 4.17                   |

(continued)

Table 4 | continued

| Date       | Time  | Flow    | Flow multiplier | HGL (m) | HGL multiplier | Observed pressure   |                       |
|------------|-------|---------|-----------------|---------|----------------|---------------------|-----------------------|
|            |       |         |                 |         |                | PMP-1 (Ambazari CP) | PMP-2 (Telankhedi CP) |
| 31-10-2018 | 19:00 | 743.583 | 1.013           | 332.17  | 1.0083         | 5.48                | 4.31                  |
| 31-10-2018 | 19:15 | 720.237 | 0.981           | 332.22  | 1.0085         | 5.63                | 4.56                  |
| 31-10-2018 | 19:30 | 723.136 | 0.985           | 332.27  | 1.0086         | 5.72                | 4.79                  |
| 31-10-2018 | 19:45 | 736.259 | 1.003           | 332.38  | 1.0090         | 5.87                | 4.99                  |
| 31-10-2018 | 20:00 | 671.865 | 0.915           | 335.88  | 1.0196         | 8.2                 | 4.89                  |
| 31-10-2018 | 20:15 | 684.683 | 0.933           | 339.6   | 1.0309         | 10.93               | 3.46                  |
| 31-10-2018 | 20:30 | 667.745 | 0.910           | 339.53  | 1.0307         | 11.08               | 3.23                  |
| 31-10-2018 | 20:45 | 646.840 | 0.881           | 339.49  | 1.0305         | 11.36               | 3.19                  |
| 31-10-2018 | 21:00 | 662.557 | 0.902           | 339.59  | 1.0308         | 11.66               | 3.24                  |
| 31-10-2018 | 21:15 | 635.395 | 0.865           | 339.72  | 1.0312         | 11.86               | 3.24                  |
| 31-10-2018 | 21:30 | 663.778 | 0.904           | 339.95  | 1.0319         | 12.2                | 3.33                  |
| 31-10-2018 | 21:45 | 670.949 | 0.914           | 340.14  | 1.0325         | 12.63               | 3.39                  |
| 31-10-2018 | 22:00 | 660.573 | 0.900           | 340.23  | 1.0328         | 12.89               | 3.62                  |
| 31-10-2018 | 22:15 | 695.975 | 0.948           | 339.09  | 1.0293         | 12.19               | 5.97                  |
| 31-10-2018 | 22:30 | 627.613 | 0.855           | 339.49  | 1.0305         | 12.79               | 12                    |
| 31-10-2018 | 22:45 | 623.646 | 0.849           | 340.16  | 1.0326         | 13.49               | 13.11                 |
| 31-10-2018 | 23:00 | 610.828 | 0.832           | 340.53  | 1.0337         | 14.06               | 13.95                 |
| 31-10-2018 | 23:15 | 590.838 | 0.805           | 340.74  | 1.0343         | 14.31               | 14.69                 |
| 31-10-2018 | 23:30 | 577.868 | 0.787           | 341.05  | 1.0353         | 14.74               | 15.53                 |
| 31-10-2018 | 23:45 | 579.699 | 0.790           | 341.21  | 1.0358         | 14.92               | 15.88                 |

the complexities and challenges involved in the study area for calibration. Further, it describes the detailed steps in different stages carried out for manual calibration of the study area where the difference between the field observation data and model simulated result is significant.

Initially, data are collected from water supply utilities and from the field. Estimation of nodal demand requires a lot of effort and a huge amount of time. Nodal demand is estimated based on consumer usage information, i.e. from water billing data. The accuracy of static information e.g. node elevation, topological structure, pipe material, length, and diameter, and dynamic information, e.g. operational data of valves, is verified in the process of manual calibration. Data are verified from the field, and based on the operation of the WDN and its coverage, the model is corrected. Based on the readings of the flow meter at the ESR and pressure loggers at two pre-defined PMPs in the field, the initial comparison of modeled and observed pressures

at the two predetermined pressure monitoring points PMP-1 and PMP-2 are carried out and it shows that there is a lot of difference between observed and simulated readings at both the PMPs. Therefore, the model requires a micro-level of calibration.

Micro-calibration is performed, where four pressure loggers are additionally installed at the ESR premises. Readings are observed at ESR premises and shown in Figure 5. After observation of readings, it is observed that at both PMPs negative pressure arises at some particular time. Therefore, inlet flow is increased and readings are observed on both PMPs. Throttled valves are modeled based on percentage opening and verified from the field. It is observed that the difference between the observed and simulated pressures for PMP-1 is high, i.e. 4.137 m and 4.034 m at times 20.15 pm and 20.30 pm, respectively, and the rest of day the pressure difference is small (1 to 2 metres). However, this difference is high for PMP-2 during the period from



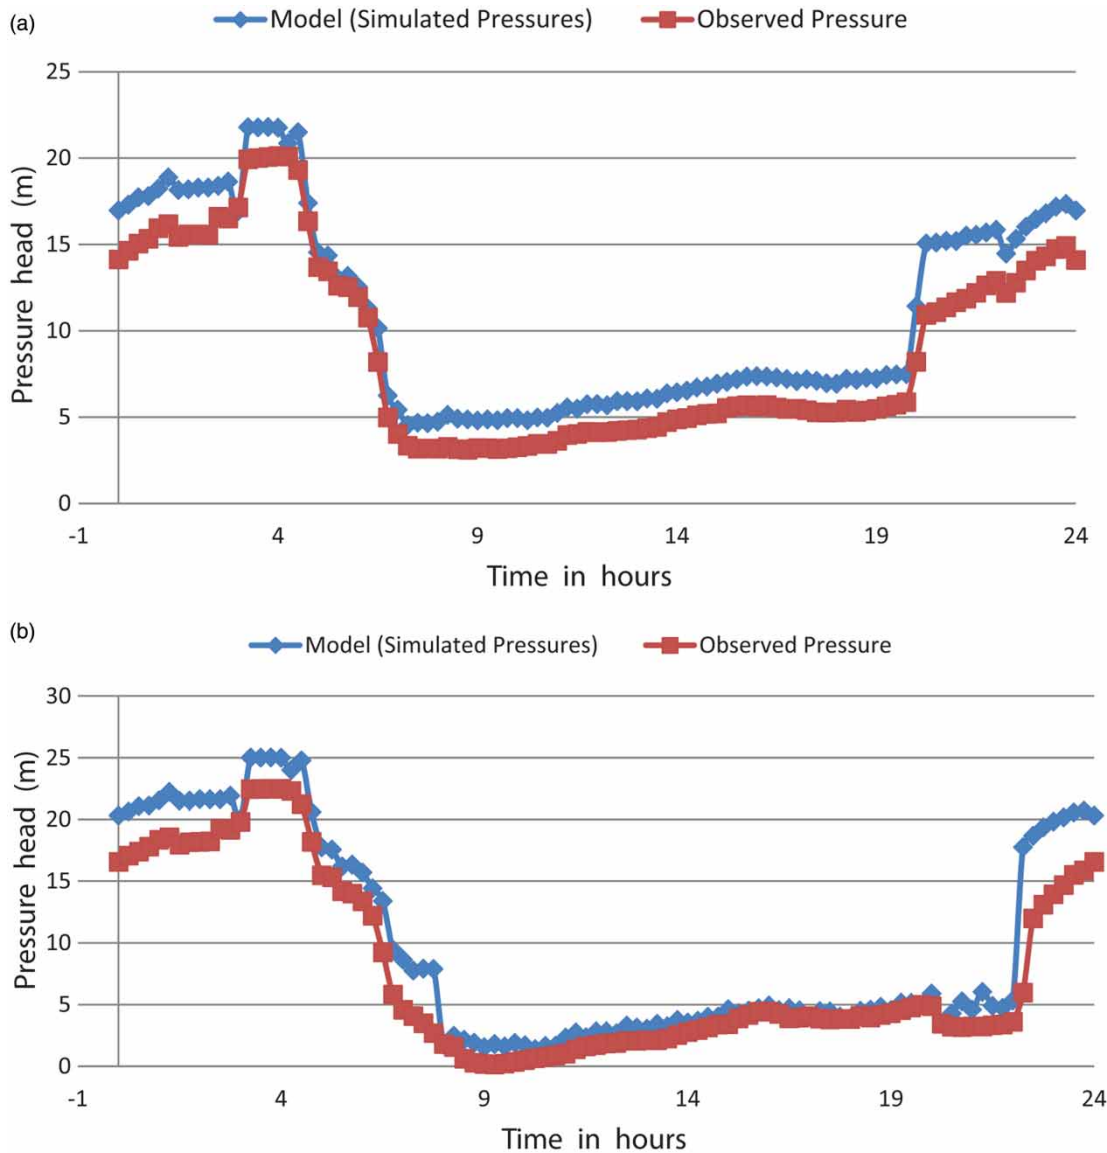

**Figure 6** | Comparison of computed/simulated pressure (top lines) with observed pressure (bottom lines) at both CP: (a) Ambazari Hill-Top Slum (PMP-1/CP1), (b) Telankhedi Slum (PMP-2/CP2).

22.25 pm to 23.25 pm and the values range between 6.085 m and 8.337 m, and the rest of the times the pressure is less than 5.6 m since it is difficult to obtain the percentage of valve openings, closings and the timings for the two valves. Little effort is again required for best matching the graph at PMP-2. However, one can use the model for various purposes for design, analysis, and operation of water distribution systems. This method worked well and could be used for any large water distribution system such as in different zones of Nagpur City or any other city in India

or another country. The problem identified in the case study is that for the second pressure monitoring point (PMP-2), the pressure difference is quite high because of not obtaining the details of two valves. Therefore, there is a need to calibrate this model using optimization. The process of calibration of the case study using genetic algorithm goes on for minimizing the pressure difference between observed and simulated pressures at both the PMPs. In the optimization process, valve throttling would be the decision variables and work goes on on for exact

matching of the graphs of observed and simulated pressure readings.

## ACKNOWLEDGEMENT

The authors are thankful to Department of Science and Technology, India for the financial assistance received. The authors are thankful to Director, NEERI and Director, VNIT for providing necessary support to undertake this project. The authors are thankful to CEO, Mr Sanjay Roy and Engineer Mr Vijay Mandlik of Orange City Water Works for extending help in providing the necessary data for calibration of a model. The authors are also thankful to the site engineer and other staff for providing operational and related necessary information and Dr R. D. Jadhao for giving his valuable suggestions.

## REFERENCES

- Bascià, A. & Tucciarelli, T. 2003 Simultaneous zonation and calibration of pipe network parameters. *Journal of Hydraulic Engineering* **129** (5), 394–403.
- Bhave, P. 1988 Calibrating water distribution network models. *Journal of Environmental Engineering* **114** (1), 120–136.
- Bhave, P. R. & Gupta, R. 2006 *Analysis of Water Distribution Network*. Narosa Publication House Pvt. Ltd, New Delhi, India.
- Boulos, P. F. & Wood, D. J. 1990 Explicit calculation of pipe-network parameters. *Journal of Hydraulic Engineering* **116** (11), 1329–1344.
- Cesario, A. L. & Davis, J. O. 1984 Calibrating water system models. *Journal of American Water Works Association* **76** (7), 66–69.
- Datta, R. S. N. & Sridharan, K. 1994 Parameter estimation in water-distribution systems by least squares. *Journal of Water Resources Planning and Management* **120** (4), 405–422.
- Dini, M. & Tabesh, M. 2014 A new method for simultaneous calibration of demand pattern and Hazen–Williams coefficients in water distribution systems. *Water Resources Management* **28** (7), 2021–2034.
- Di Nardo, A., Di Natale, M., Gisonni, C. & Iervolino, M. 2015 A genetic algorithm for demand pattern and leakage estimation in a water distribution network. *Journal of Water Supply: Research and Technology – AQUA* **64** (1), 35–46.
- Do, N. C., Simpson, A. R., Deuerlein, J. W. & Piller, O. 2016 Calibration of water demand multipliers in water distribution systems using genetic algorithms. *Journal of Water Resources Planning and Management* **142** (11), 04016044.
- Duan, H. F. 2015 Uncertainty analysis of transient flow modeling and transient-based leak detection in elastic water pipeline systems. *Water Resources Management* **29** (14), 5413–5427.
- Duan, H. F., Tung, Y. K. & Ghidaoui, M. S. 2010 Probabilistic analysis of transient design for water supply systems. *Journal of Water Resources Planning and Management* **136** (6), 678–687.
- Greco, M. & Giudice, G. D. 1999 New approach to water distribution network calibration. *Journal of Hydraulic Engineering* **125** (8), 849–854.
- Huang, Y., Duan, H. F., Zhao, M., Zhang, Q., Zhao, H. & Zhang, K. 2017a Probabilistic analysis and evaluation of nodal demand effect on transient analysis in urban water distribution systems. *Journal of Water Resources Planning and Management* **143** (8), 04017041.
- Huang, Y., Duan, H. F., Zhao, M., Zhang, Q., Zhao, H. & Zhang, K. 2017b Transient influence zone based decomposition of water distribution networks for efficient transient analysis. *Water Resources Management* **31** (6), 1915–1929.
- Jadhao, R. D. & Gupta, R. 2018 Calibration of water distribution network of the Ramnagar Zone in Nagpur City using online pressure and flow data. *Applied Water Science* **8** (1), 29.
- Kang, D. S. & Lansey, K. 2011 Demand and roughness estimation in water distribution systems. *Journal of Water Resources Planning and Management* **137** (1), 20–30.
- Kapelan, Z. S., Savic, D. A. & Walters, G. A. 2007 Calibration of water distribution hydraulic models using a Bayesian-type procedure. *Journal of Hydraulic Engineering* **133** (8), 927–936.
- Koppel, T. & Vassiljev, A. 2009 Calibration of a model of an operational water distribution system containing pipes of different age. *Advances in Engineering Software* **40** (8), 659–664.
- Kumar, S. M., Narasimhan, S. & Bhallamudi, S. M. 2010 Parameter estimation in water distribution networks. *Water Resources Management* **24**, 1251–1272.
- Kun, D., Tian-Yu, L., Jun-Hui, W. & Jin-Song, G. 2015 Inversion model of water distribution systems for nodal demand calibration. *Journal of Water Resources Planning and Management* **141** (9), 04015002.
- Lansey, K. E. & Basnet, C. 1991 Parameter estimation for water distribution networks. *Journal of Water Resources Planning and Management* **117** (1), 126–144.
- Lansey, K. E., El-Shorbagy, W., Ahmed, I., Araujo, J. & Haan, C. T. 2001 Calibration assessment and data collection for water distribution networks. *Journal of Hydraulic Engineering* **127** (4), 270–279.
- Lingireddy, S. & Ormsbee, L. E. 2002 Hydraulic network calibration using genetic optimization. *Civil Engineering and Environmental Systems* **19** (1), 13–39.
- Maier, H., Kapelan, Z., Kasprzyk, J., Kollat, J., Matott, L. S., Cunha, M. C., Dandy, G. C., Gibbs, M. S., Keedwell, E., Marchi, A., Ostfeld, A., Savic, D., Solomatine, D. P., Vrugt,

- J. A., Zecchin, A. C., Minsker, B. S., Barbour, E. J., Kuczera, G., Pasha, F., Castelletti, A., Giuliani, M. & Reed, P. M. 2014 Evolutionary algorithms and other metaheuristics in water resources: current status, research challenges and future directions. *Environmental Modelling & Software* **62**, 271–299.
- Méndez, M., Araya, J. A. & Sánchez, L. D. 2013 Automated parameter optimization of a water distribution system. *Journal of Hydroinformatics* **15** (1), 71–85.
- Ormsbee, L. E. 1989 Implicit network calibration. *Journal of Water Resources Planning and Management* **115** (2), 243–257.
- Ormsbee, L. E. & Lingireddy, S. 1997 Calibration of hydraulic network models. *Journal of American Water Works Association* **89** (2), 42–50.
- Ormsbee, L. E. & Wood, D. J. 1986 Explicit pipe network calibration. *Journal of Water Resources Planning and Management* **112** (2), 166–182.
- Rahal, C. M., Sterling, M. J. H. & Coulbeck, B. 1980 Parameter tuning for simulation models of water distribution networks. *Proceedings of the Institution of Civil Engineers* **69** (3), 751–762.
- Reddy, P. V. N., Sridharan, K. & Rao, P. V. 1996 WLS method for parameter estimation in water distribution networks. *Journal of Water Resources Planning and Management* **122** (3), 157–164.
- Sanz, G. & Pérez, R. 2015 Sensitivity analysis for sampling design and demand calibration in water distribution networks using the singular value decomposition. *Journal of Water Resources Planning and Management* **141** (10), 04015020.
- Shamir, U. & Howard, C. D. D. 1977 Engineering analysis of water-distribution systems. *Journal of American Water Works Association* **69** (9), 510–514.
- Todini, E. 1999 Using a Kalman filter approach for looped water distribution networks calibration. In: *Water Industry Systems: Modelling and Optimization Applications* (D. A. Savic & G. A. Walters, eds), Research Studies Press, Baldock, UK, pp. 327–336.
- Walski, T. M. 1983 Technique for calibrating network models. *Journal of Water Resources Planning and Management* **109** (4), 360–372.
- Walski, T. M. 1986 Case study: pipe network model calibration issues. *Journal of Water Resources Planning and Management* **112** (2), 238–249.
- Walski, T. M., Chase, D. V., Savic, D. A., Grayman, W., Beckwith, S. & Koelle, E. 2003 *Advanced Water Distribution Modeling and Management*. Haestad Methods, Inc., Waterbury, CT, USA.
- Wu, Z. Y., Walski, T. M., Mankowski, R., Herrin, G., Gurrieri, R. & Tryby, M. 2002 Calibrating water distribution model via genetic algorithms. In: *AWWA IMTech Conference*, Kansas City, MO, USA.

First received 12 September 2019; accepted in revised form 6 March 2020. Available online 23 March 2020
